# Supplementary material for: Aerosol assisted chemical vapour deposition of transparent conductive ZnO thin films with hexagonal microplate surfaces and ultrahigh haze values
Source: Royal Society of Chemistry journal article supplement (doi:10.1039/c5ta06029j), 2015-01-01
Supplement: c5ta06029j1.pdf [file c5ta06029j1.pdf]

## Aerosol assisted chemical vapour deposition of transparent conductive ZnO thin films with hexagonal microplate surface and ultrahigh haze value

Shuqun Chen,<sup>a</sup> Martyn McLachlan,<sup>b</sup> Andrei Sapelkin,<sup>c</sup> and Russell Binions<sup>a\*</sup>

<sup>a</sup> School of Engineering and Materials Science, Queen Mary University of London, London E1 4NS, UK. E-mail: r.binions@qmul.ac.uk

<sup>b</sup> Department of Materials, Royal School of Mines, Imperial College London, London, UK

<sup>c</sup> Department of Physics and Astronomy, Queen Mary University of London, London E1 4NS, UK.

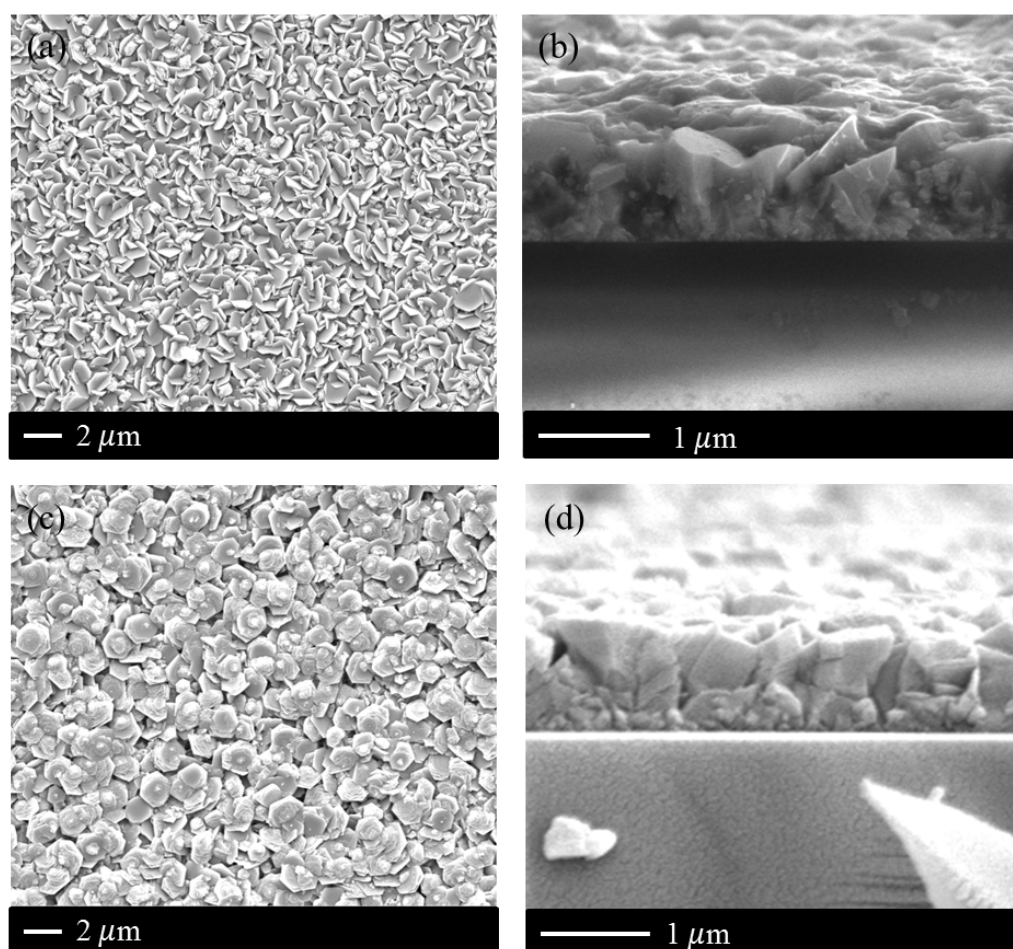

Figure S1 Surface and cross-section SEM images of (a), (b) ZnO-a and (c), (d) ZnO-aw films.

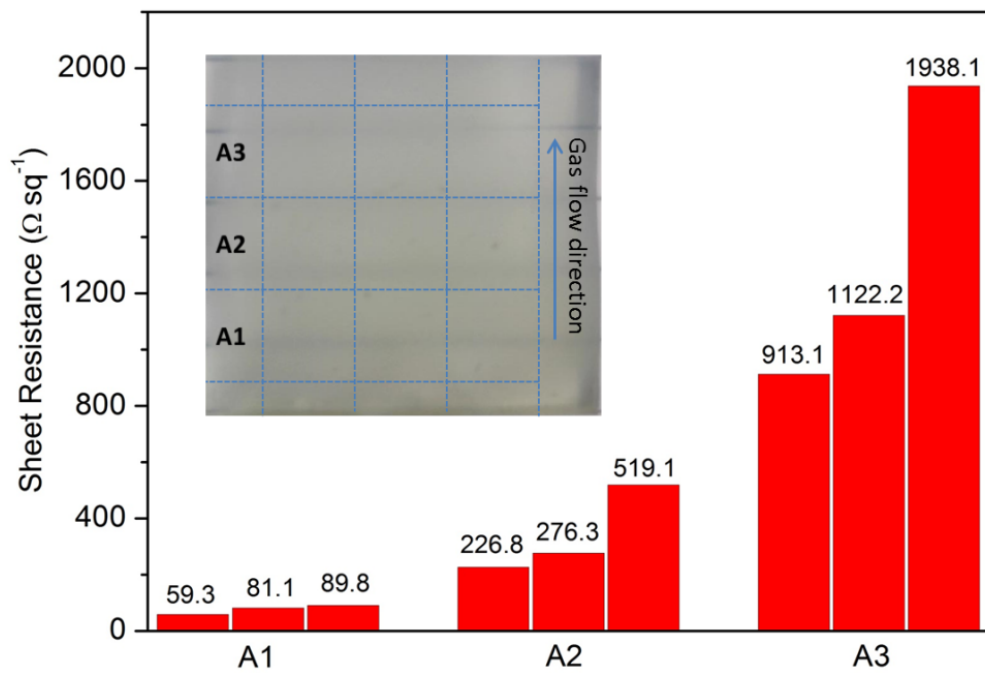

Figure S2 Film conductivity as a function of gas flow distance for a typical ZnO-aw sample.
